# Supplementary material for: Nuclear quantum effects in the direct ionization process of pure helium clusters: path-integral and ring-polymer molecular dynamics simulations on the diatomics-in-molecule potential energy surfaces
Source: Royal Society of Chemistry journal article supplement (doi:10.1039/c8cp05389h), 2018-01-01
Supplement: c8cp05389h1.pdf [file c8cp05389h1.pdf]

## Electronic Supplementary Information

### **Nuclear quantum effects in direct ionization processes of pure helium clusters: path-integral and ring-polymer molecular dynamics simulations on the diatomics-in-molecule potential energy surfaces<sup>†</sup>**

Kento Suzuki, Takaaki Miyazaki, Toshiyuki Takayanagi\*

Department of Chemistry, Saitama University, Shimo-Okubo 255, Sakura-ku, Saitama City,  
Saitama 338-8570, JAPAN

Motoyuki Shiga

Center for Computational Science and E-Systems, Japan Atomic Energy Agency, 148-4,  
Kashiwanoha, Campus, 178-4 Wakashiba, Kashiwa, Chiba 277-0871, Japan

## Summary of Electronic Supplementary Information

Table S1 summarizes the SAC-CI and DIM results used in Fig. 1 of the main text. Table S2 summarizes the Cartesian coordinates used in the SAC-CI calculations.

Fig. S1 compares the ionization spectra calculated with the SAC-CI/aug-cc-pVQZ level to the spectra calculated with the SAC-CI/6-31+G(3*df*) level. The same cluster structures in Table S2 were used.

Fig. S2 displays time evolution of the RPMD trajectory for the  $\text{He}_{100}^+$  cluster when the initial ionization state is assumed to be the 79-th adiabatic excited state. The corresponding adiabatic populations and atomic charges are presented in Fig. S3 as a function of the simulation time.

Fig. S4 shows time evolution of the RPMD trajectory for the  $\text{He}_{200}^+$  cluster when the initial ionization state is assumed to be the 151-st adiabatic excited state. Notice that the initial positive charge is distributed among several He atoms in this case. The corresponding adiabatic populations and atomic charges are presented in Fig. S5 as a function of the simulation time.

Fig. S6 displays time evolution of the RPMD trajectory for the  $\text{He}_{200}^+$  cluster when the initial ionization state is assumed to be the adiabatic ground state. The corresponding adiabatic populations and atomic charges are presented in Fig. S7 as a function of the simulation time.

Fig. S8 displays time evolution of the RPMD trajectory for the  $\text{He}_{300}^+$  cluster when the initial ionization state is assumed to be the adiabatic ground state. The corresponding adiabatic populations and atomic charges are presented in Fig. S9 as a function of the simulation time.

Fig. S10 displays time evolution of the RPMD trajectory for the  $\text{He}_{300}^+$  cluster when the initial ionization state is assumed to be the adiabatic ground state (a different initial structure from Fig. S8 is used). The corresponding adiabatic populations and atomic charges are presented in Fig. S11 as a function of the simulation time.

**Table S1**

Numerical data used in Fig. 1 of the main text. The ionization energy levels and the corresponding intensities obtained from the ab initio SAC-CI/aug-cc-pVQZ level calculations and the DIM energy levels are summarized.

| State                        | SAC-CI/aug-cc-pVQZ |                                | DIM         |
|------------------------------|--------------------|--------------------------------|-------------|
|                              | Energy (eV)        | Intensity (Relative Intensity) | Energy (eV) |
| <hr/>                        |                    |                                |             |
| He <sub>4</sub> <sup>+</sup> |                    |                                |             |
| 1                            | 24.408             | 0.96956 (0.9991)               | 24.464      |
| 2                            | 24.412             | 0.96953 (0.9990)               | 24.464      |
| 3                            | 24.435             | 0.96954 (0.9990)               | 24.464      |
| 4                            | 24.686             | 0.97048 (1.0000)               | 24.662      |
|                              |                    |                                |             |
| He <sub>5</sub> <sup>+</sup> |                    |                                |             |
| 1                            | 24.394             | 0.96995 (0.9989)               | 24.420      |
| 2                            | 24.426             | 0.97015 (0.9991)               | 24.440      |
| 3                            | 24.427             | 0.97016 (0.9991)               | 24.440      |
| 4                            | 24.531             | 0.96947 (0.9984)               | 24.511      |
| 5                            | 24.730             | 0.97101 (1.0000)               | 24.677      |
|                              |                    |                                |             |
| He <sub>6</sub> <sup>+</sup> |                    |                                |             |
| 1                            | 24.331             | 0.97118 (0.9991)               | 24.394      |
| 2                            | 24.369             | 0.97129 (0.9992)               | 24.411      |
| 3                            | 24.422             | 0.97023 (0.9981)               | 24.417      |
| 4                            | 24.444             | 0.97186 (0.9998)               | 24.474      |
| 5                            | 24.525             | 0.97208 (1.0000)               | 24.534      |
| 6                            | 24.709             | 0.97204 (1.0000)               | 24.688      |
| <hr/>                        |                    |                                |             |

**Table S2**

Cartesian coordinates (in unit of Å) for the  $\text{He}_n^+$  ( $n = 4, 5$  and  $6$ ) clusters used in the SAC-CI calculations

| Cluster         | X        | Y        | Z        |
|-----------------|----------|----------|----------|
| <hr/>           |          |          |          |
| $\text{He}_4^+$ |          |          |          |
| He              | 0.48024  | -0.23315 | 1.22264  |
| He              | -1.59088 | -1.30019 | -0.61956 |
| He              | 0.51119  | 0.52891  | -1.64793 |
| He              | -1.61773 | 1.57049  | 0.14224  |
| <br>            |          |          |          |
| $\text{He}_5^+$ |          |          |          |
| He              | 0.82998  | 0.25021  | 0.32845  |
| He              | -1.63477 | -1.36378 | -0.07445 |
| He              | -0.91194 | 0.75659  | -2.01709 |
| He              | -0.85303 | -0.49886 | 2.65196  |
| He              | -1.84269 | 1.50011  | 0.69830  |
| <br>            |          |          |          |
| $\text{He}_6^+$ |          |          |          |
| He              | 0.24333  | -0.85590 | 0.41683  |
| He              | -2.47858 | -1.35901 | -0.64824 |
| He              | -0.81788 | 0.83281  | -1.76761 |
| He              | 0.03135  | 0.48342  | 3.04569  |
| He              | -1.96488 | -1.57035 | 2.26336  |
| He              | -1.96404 | 1.08755  | 0.94735  |
| <hr/>           |          |          |          |

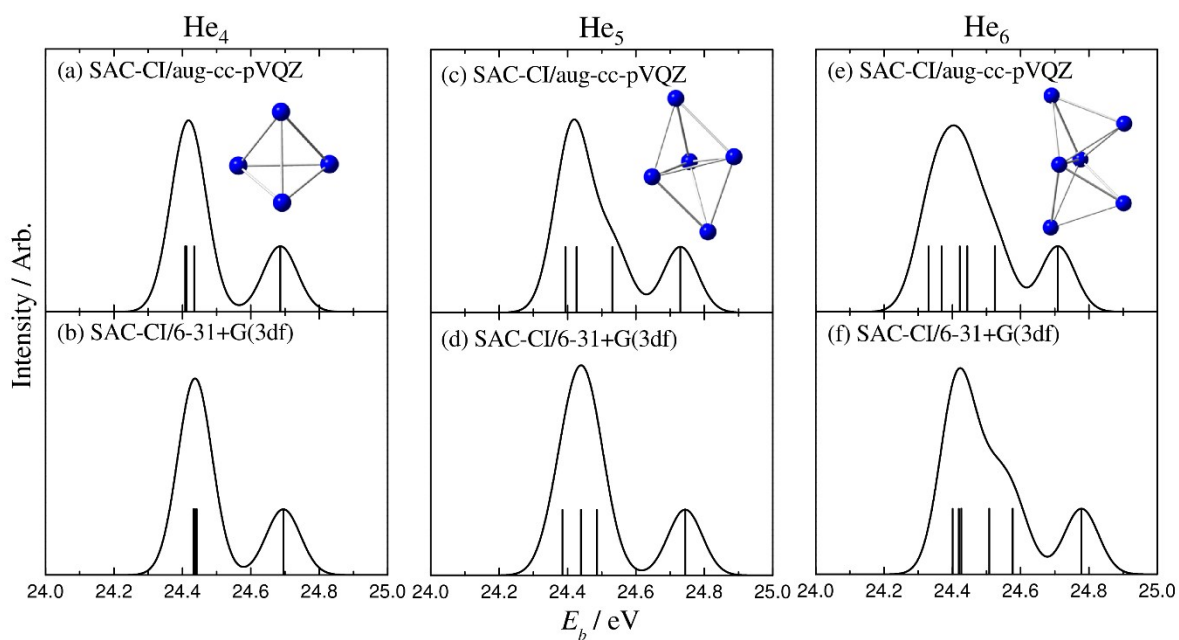

**Fig. S1**

Comparison of the ionization spectra calculated with the SAC-CI/aug-cc-pVQZ level to the spectra calculated with the SAC-CI/6-31+G(3df) level. The same  $\text{He}_n^+$  ( $n = 4-6$ ) cluster structures in Table S2 were used. The discrete ionization energy levels are convoluted using the Gaussian function with 120 meV width.

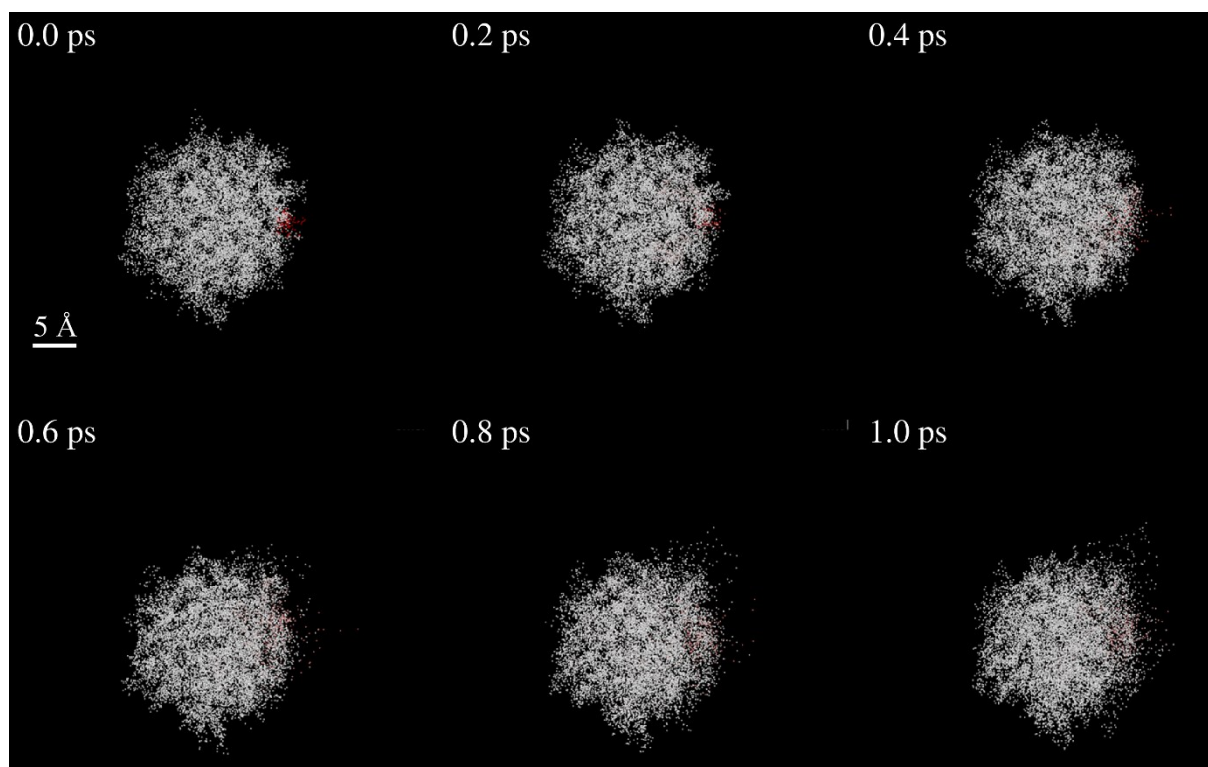

**Fig. S2**

Snapshots of the nonadiabatic RPMD trajectory showing dynamics evolution of the He<sub>100</sub><sup>+</sup> cluster when the initial ionization state is assumed to be the adiabatic 79-th excited state, for which the initial charged He atom is mainly located around the surface of the cluster. All ring-polymer beads are shown with the positively charged He atoms being shown in red color. The time interval of the snapshots is chosen to be 0.2 ps.

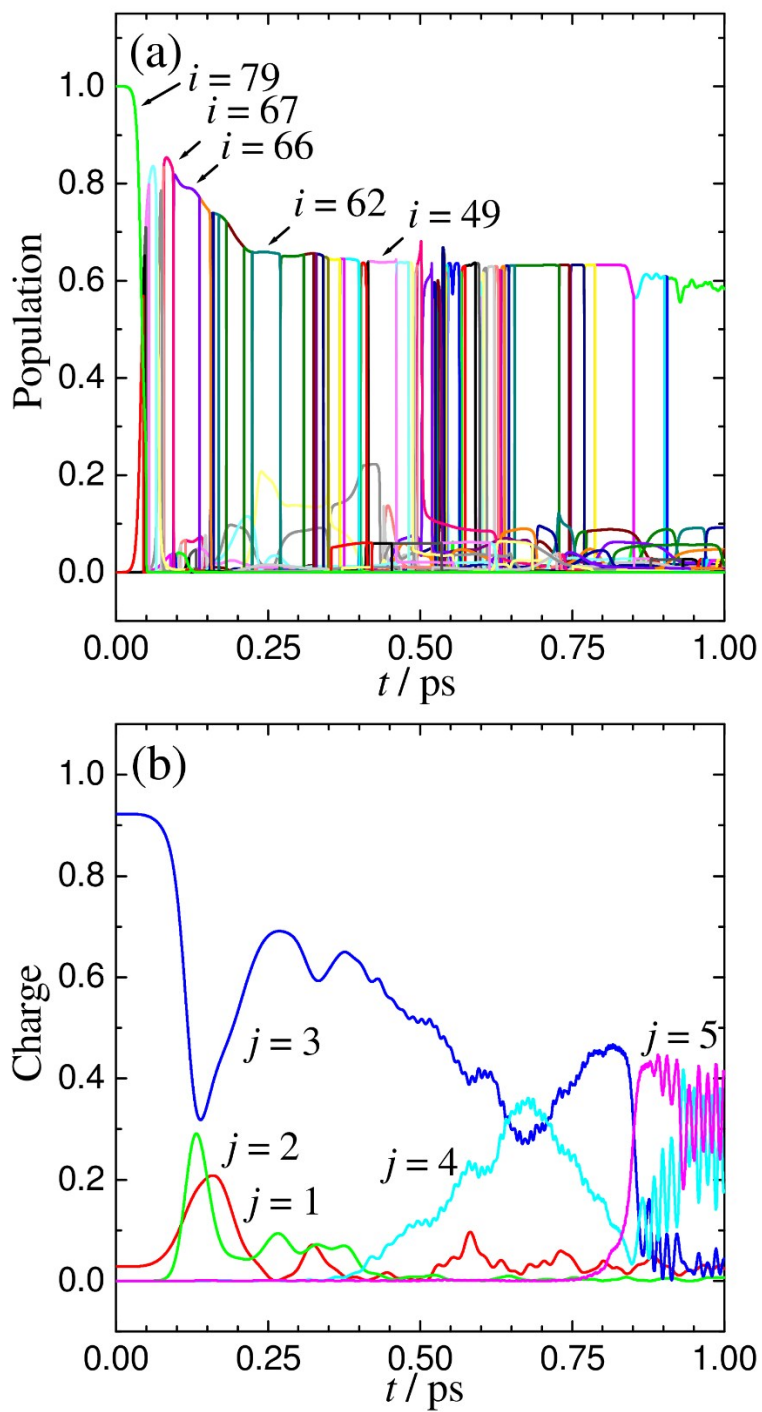

**Fig. S3**

Selected adiabatic populations (a) and atomic charges (b) are plotted as a function of the simulation time for the representative RPMD trajectory presented in Fig. S2.

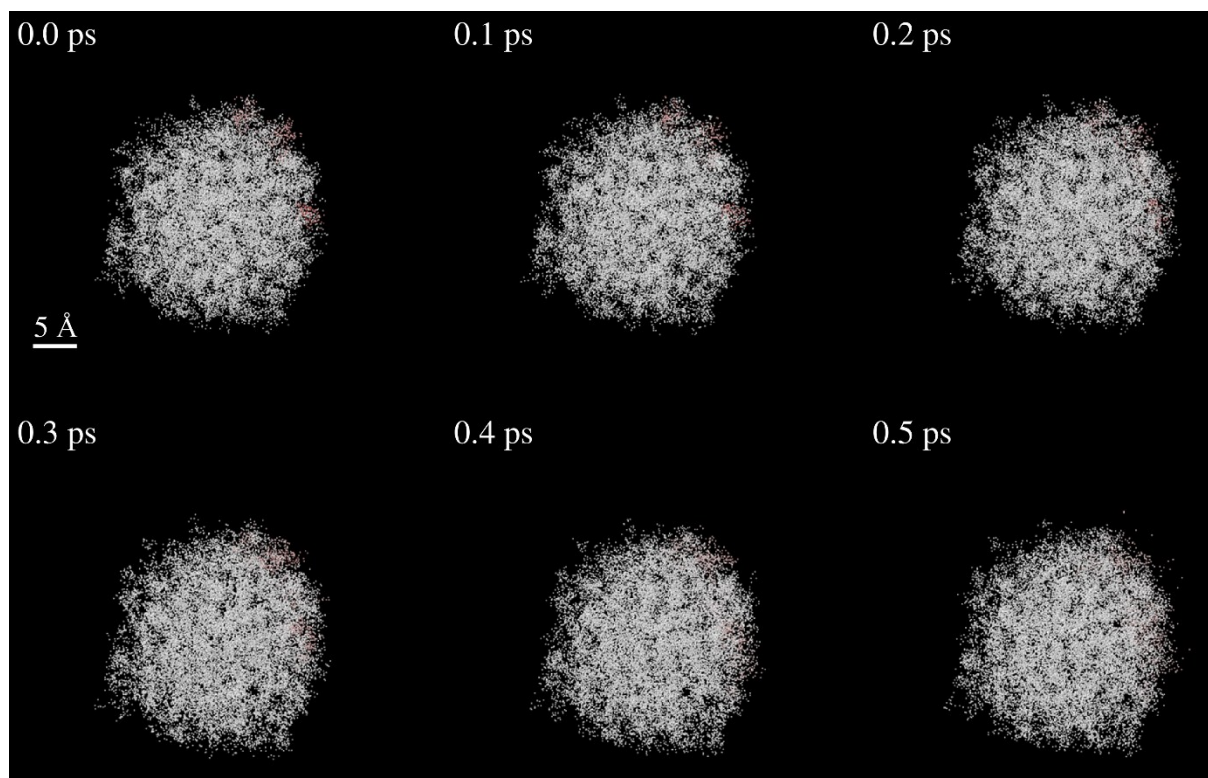

**Fig. S4**

Snapshots of the nonadiabatic RPMD trajectory showing dynamics evolution of the He<sub>200</sub><sup>+</sup> cluster when the initial ionization state is assumed to be the adiabatic 151-st excited state, for which the initial charge is distributed to two He atoms, which are mainly located around the surface region of the cluster. All ring-polymer beads are shown with the positively charged He atoms being shown in red color. The time interval of the snapshots is chosen to be 0.1 ps.



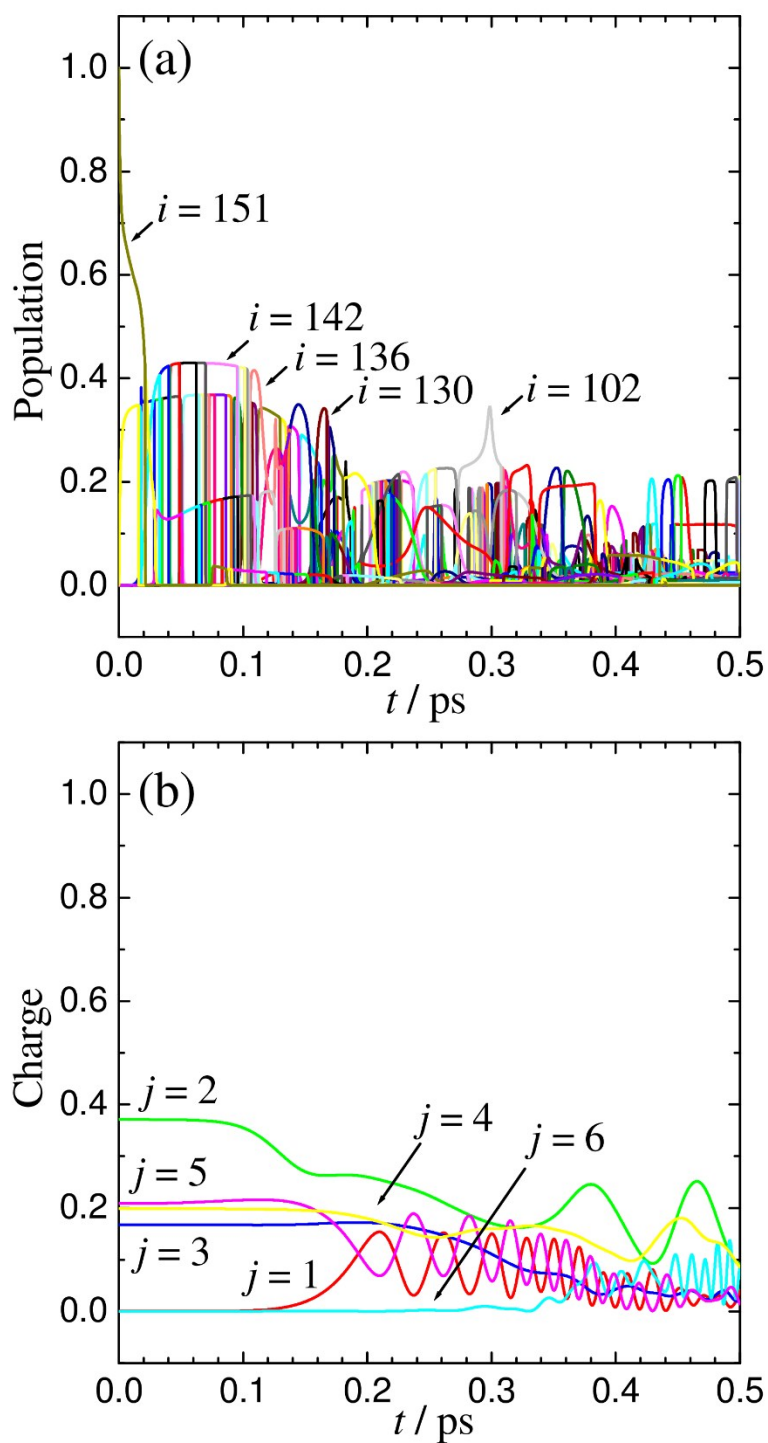

**Fig. S5**

Selected adiabatic populations (a) and atomic charges (b) are plotted as a function of the simulation time for the representative RPMD trajectory presented in Fig. S4.

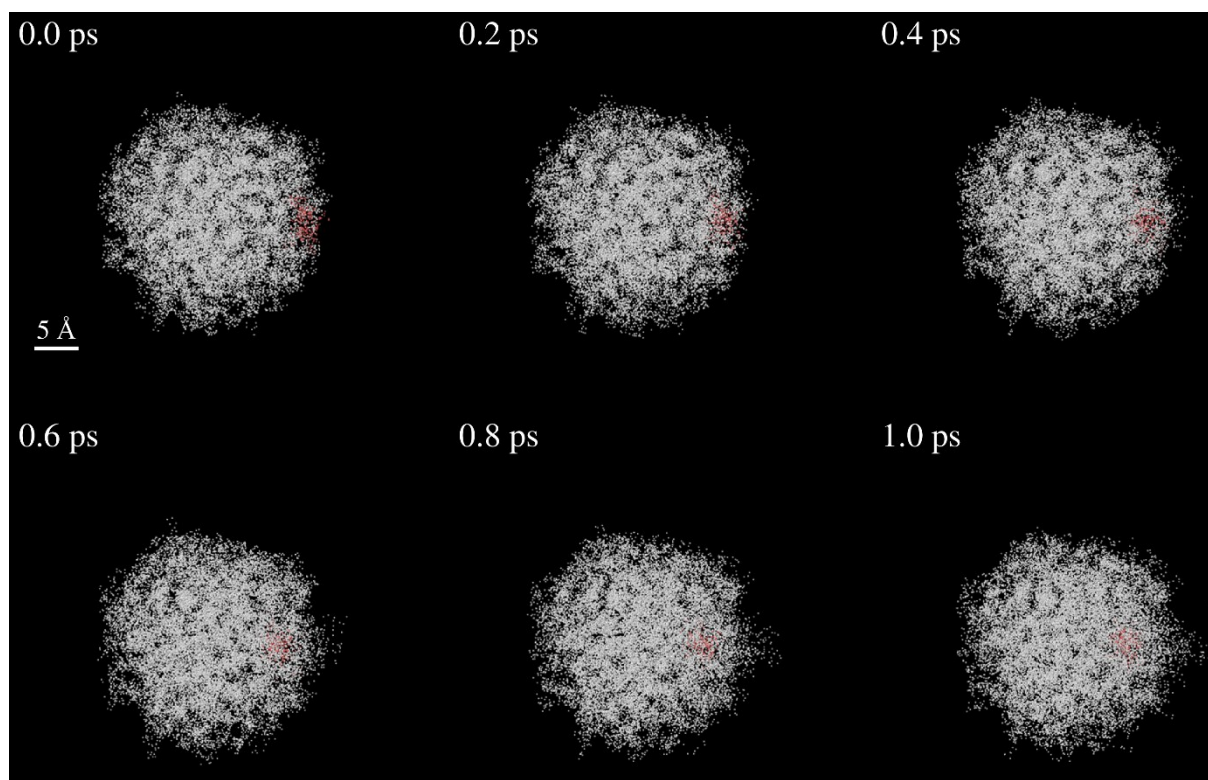

**Fig. S6**

Snapshots of the nonadiabatic RPMD trajectory showing dynamics evolution of the He<sub>200</sub><sup>+</sup> cluster when the initial ionization state is assumed to the adiabatic ground state, for which the initial charge is distributed two He atoms, which are mainly located around the surface region of the cluster. All ring-polymer beads are shown with the positively charged He atoms being shown in red color. The time interval of the snapshots is chosen to be 0.2 ps.

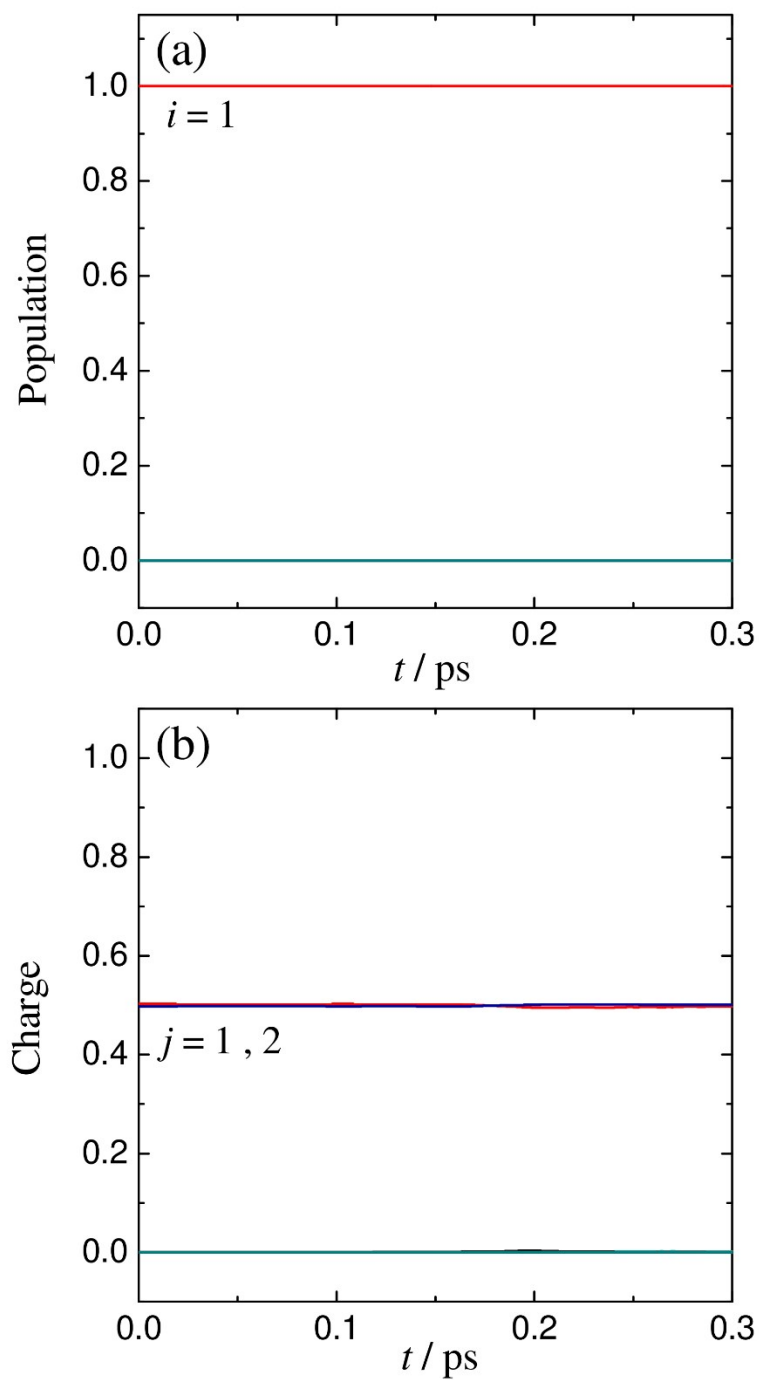

**Fig. S7**

Selected adiabatic populations (a) and atomic charges (b) are plotted as a function of the simulation time for the representative RPMD trajectory presented in Fig. S6.

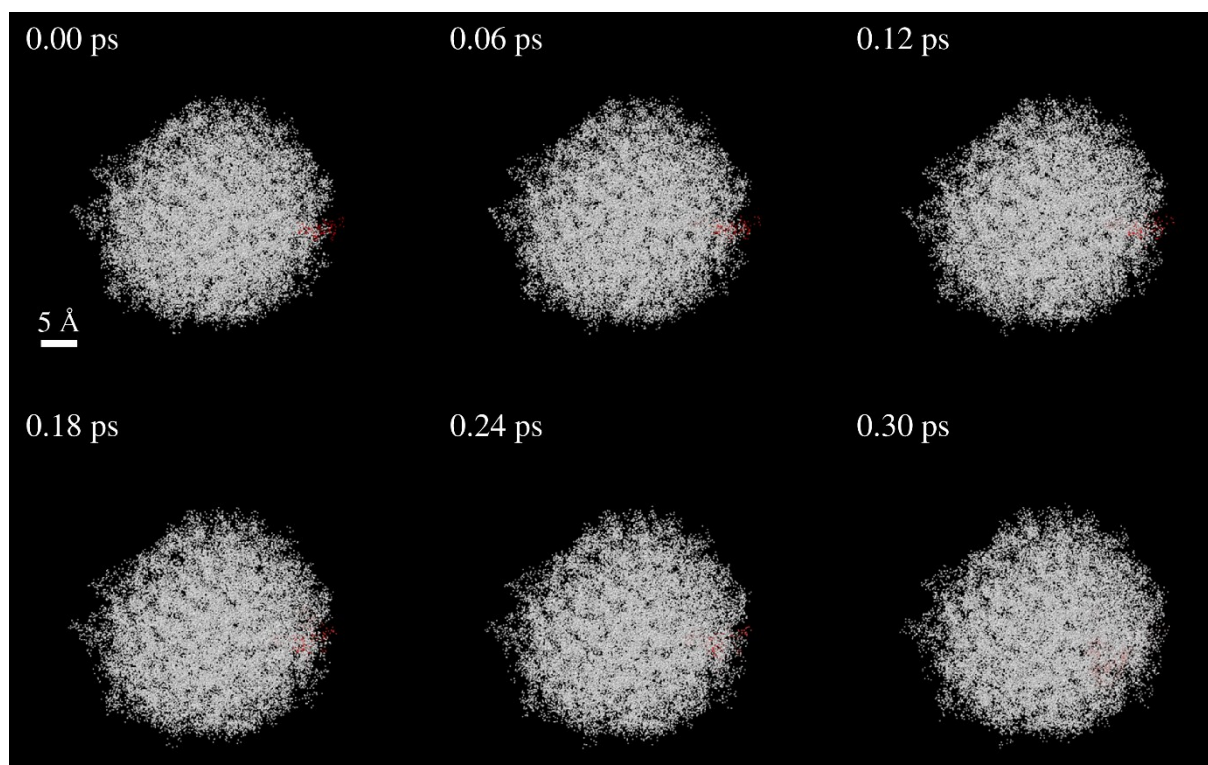

**Fig. S8**

Snapshots of the nonadiabatic RPMD trajectory showing dynamics evolution of the He<sub>300</sub><sup>+</sup> cluster when the initial ionization state is assumed to the adiabatic ground state, for which the initial charged He atom is mainly located around the surface of the cluster. All ring-polymer beads are shown with the positively charged He atoms being shown in red color. The time interval of the snapshots is chosen to be 0.06 ps.

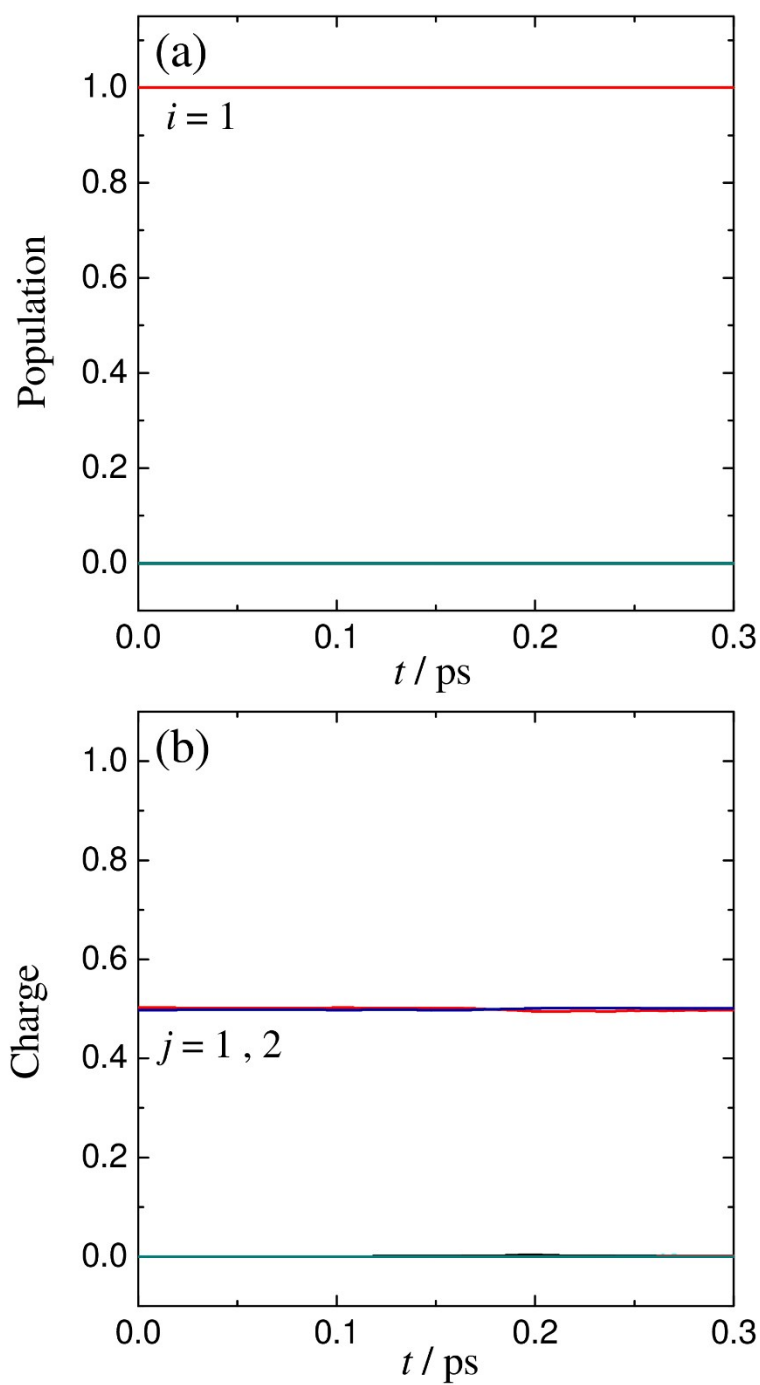

**Fig. S9**

Selected adiabatic populations (a) and atomic charges (b) are plotted as a function of the simulation time for the representative RPMD trajectory presented in Fig. S8.

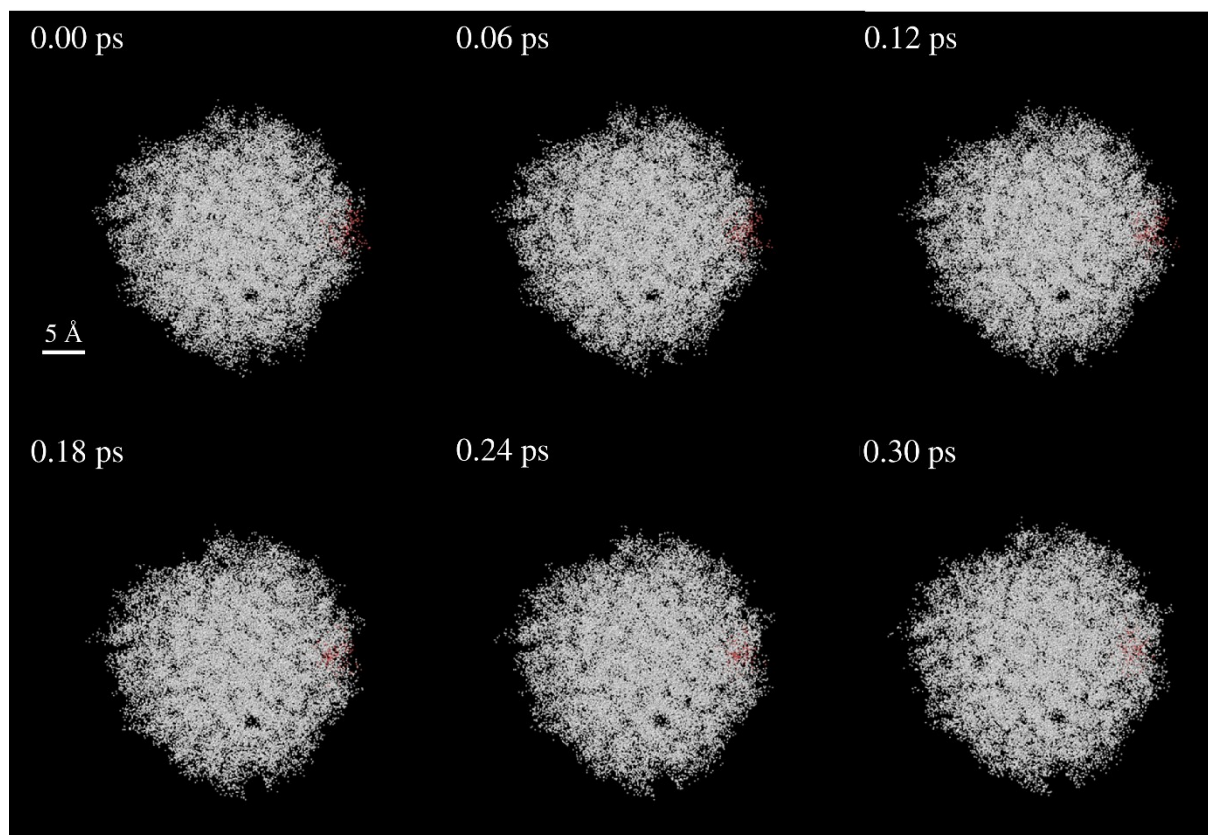

**Fig. S10**

Snapshots of the nonadiabatic RPMD trajectory showing dynamics evolution of the He<sub>300</sub><sup>+</sup> cluster when the initial ionization state is assumed to the adiabatic ground state, for which the initial charged He atom is mainly located around the surface of the cluster (a different initial structure from Fig. S8 is used). All ring-polymer beads are shown with the positively charged He atoms being shown in red color. The time interval of the snapshots is chosen to be 0.06 ps.

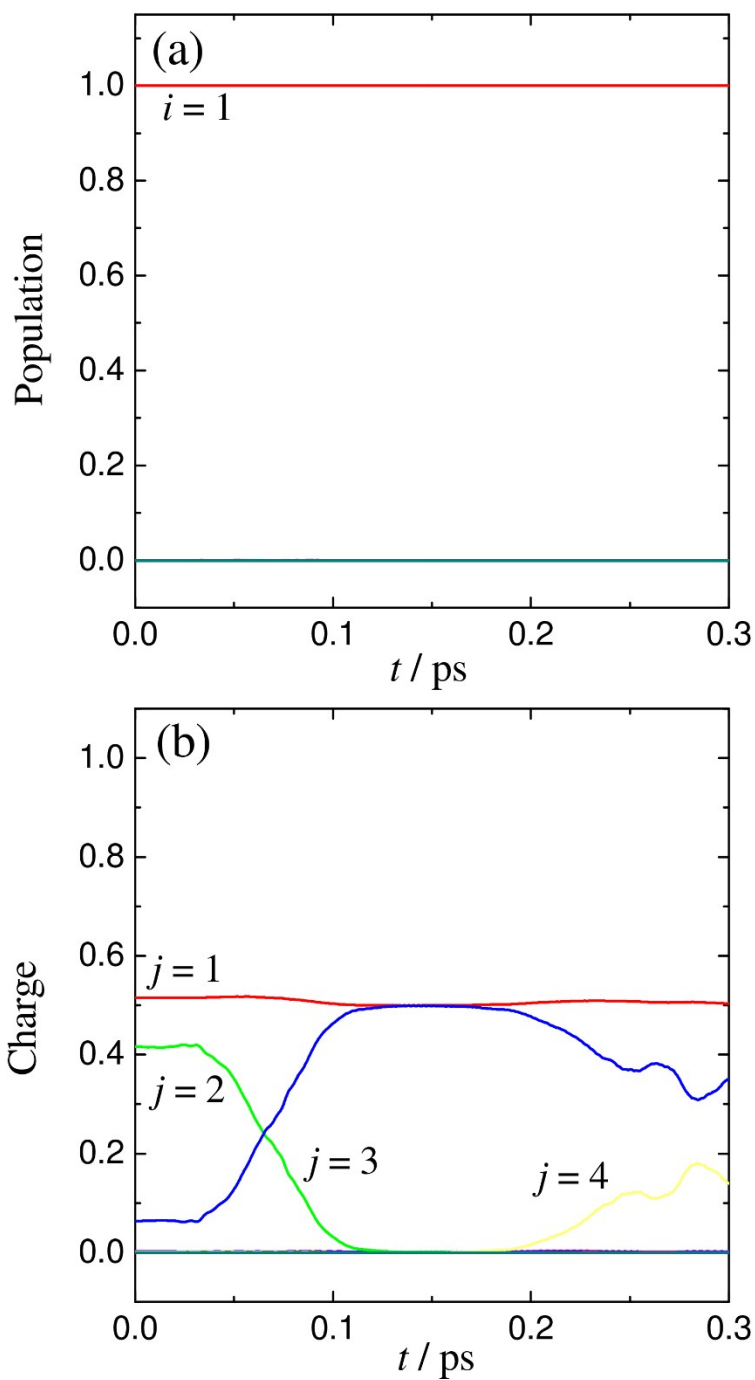

**Fig. S11**

Selected adiabatic populations (a) and atomic charges (b) are plotted as a function of the simulation time for the representative RPMD trajectory presented in Fig. S10.
